# Supplementary material for: Screening Method for Polyhydroxyalkanoate Synthase Mutants Based on Polyester Degree of Polymerization Using High-Performance Liquid Chromatography
Source: MDPI journal article supplement (doi:10.3390/microorganisms9091949), 2021-09-14
Supplement: s1 [file s1]

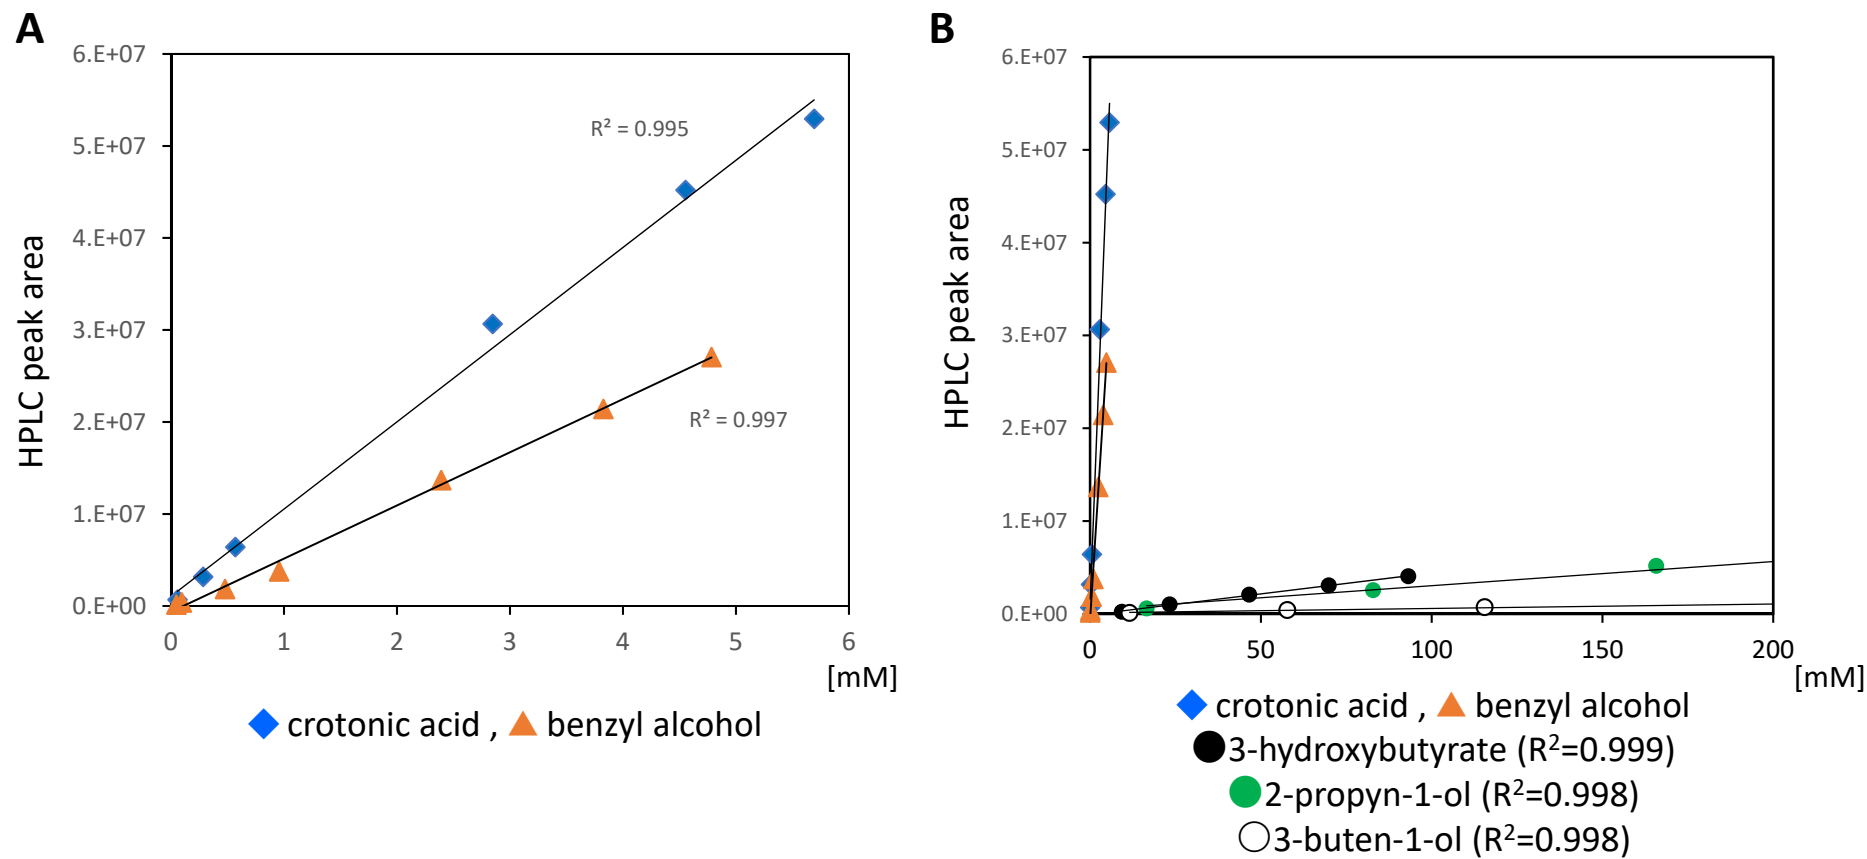

Figure S1. HPLC calibration curves for each compound.  
 (A) Crotonic acid and benzyl alcohol. (B) Detection sensitivity comparison of each compound.
