# Supplementary material for: Screening Method for Polyhydroxyalkanoate Synthase Mutants Based on Polyester Degree of Polymerization Using High-Performance Liquid Chromatography
Source: MDPI journal article supplement (doi:10.3390/microorganisms9091949), 2021-09-14
Supplement: s1 [file s1]

**Table S1.** Primers for site-directed mutagenesis.

| Primer Name | Sequence                                 |
|-------------|------------------------------------------|
| I173N-F     | 5'- GCCAATTCGTAACCTAAACTTTATGACAAG-3'    |
| I173N-R     | 5'- CTTGTCATAAAGTTTAGGTTACGAATTGGC-3'    |
| N207D-F     | 5'- CGGTTGATACATTTGGAGACATTCCGCCAG -3'   |
| N207D-R     | 5'- CTGGCGGAATGTCTCCAAATGTATCAACCG-3'    |
| P209L-F     | 5'- CATTTGGAACATTCTGCCAGAAATGATTG -3'    |
| P209L-R     | 5'- CAATCATTTCTGGCAGAATGTTTCCAAATG-3'    |
| E211G-F     | 5'- CATTCCGCCAGGAATGATTGATTTCGG-3'       |
| E211G-R     | 5'- CCGAAATCAATCATTCCTGGCGGAATG-3'       |
| D255V-F     | 5'-GTGGGTTGGTGTGTTGGTATTCCGTTCCCAGG-3'   |
| D255V-R     | 5'-CCTGGGAACGGAATACCAACACCAACCCAC-3'     |
| N274S-F     | 5'-CGTGATTTTTATCAAAGTAATAAATTGG-3'       |
| N274S-R     | 5'- CCAATTTATTACTTTGATAAAAATCACG-3'      |
| E281D-F     | 5'- GGTAAAGGGTGATCTTGTGATTGCGGGACA-3'    |
| E281D-R     | 5'-TGTCCGCGAATCACAAGATCACCCCTTAACC-3'    |
| T324A-F     | 5'-CCATATTTCTAGCGCAGATAAACAATATG-3'      |
| T324A-R     | 5'- CATATTGTTTATCTGCGCTAGAAATATGG-3'     |
| Y328H-F     | 5'-CAGATAAACAACATGTATGTTTACCGACAGG-3'    |
| Y328H-R     | 5'- CCTGTCGGTAAACATACATGTTGTTTATCTG-3'   |
| K346E-F     | 5'-GGTGGAACAGCTGTAGAACAAACATATCCG-3'     |
| K346E-R     | 5'- CGGATATGTTTGTCTACAGCTGTTCCACC-3'     |
| Q40Q-F      | 5'- CGTGAACCAGAACCACAAGTAGGATTAACG-3'    |
| Q40Q-R      | 5'-CGTTAATCCTACTTGTGGTTCTGGTTCACG-3'     |
| F124F-F     | 5'-GAAATTTGATGATTTTGTGTTTGATTATATTGC-3'  |
| F124F-R     | 5'- GCAATATAATCAAACACAAAATCATCAAATTTC-3' |
| D255D-F     | 5'-GTGGGTTGGTGATGGTATTCCGTTCCCAGG -3'    |
| D255D-R     | 5'-CCTGGGAACGGAATACCATCACCAACCCAC-3'     |
| Y264Y-F     | 5'-CCAGGTGAATCATACAGACAGTGGATTTCG-3'     |
| Y264Y-R     | 5'- CGAATCCACTGTCTGTATGATTCACCTGG-3'     |
